# Supplementary material for: Survival Patterns in United States (US) Medicare Enrollees with Non-CML Myeloproliferative Neoplasms (MPN)
Source: PubMed Central journal article supplement (PMC3949729; doi:10.1371/journal.pone.0090299), 2014-03-11
Supplement: pone.0090299.s001.pdf [file pone.0090299.s001.pdf]

**Figure S-1. Sample Attrition**

| New MPN diagnosis between Jan 1, 2001 and Dec 31, 2007                                                             |           |           |
|--------------------------------------------------------------------------------------------------------------------|-----------|-----------|
| <b>ET</b>                                                                                                          | <b>PV</b> | <b>MF</b> |
| 2,421                                                                                                              | 3,432     | 1,040     |
| ↓                                                                                                                  |           |           |
| Has at least 1 month of Medicare enrollment during the study period<br>(January 1, 2001 through December 31, 2007) |           |           |
| 2,389                                                                                                              | 3,376     | 1,022     |
| ↓                                                                                                                  |           |           |
| No HMO enrollment after first MPN diagnosis                                                                        |           |           |
| 1,720                                                                                                              | 2,502     | 760       |
| ↓                                                                                                                  |           |           |
| Reason for Medicare eligibility is age or disability, not ESRD                                                     |           |           |
| 1,711                                                                                                              | 2,460     | 754       |
| ↓                                                                                                                  |           |           |
| 1st MPN Diagnosis on/after 1st Medicare enrollment                                                                 |           |           |
| 1,547                                                                                                              | 2,137     | 662       |
| ↓                                                                                                                  |           |           |
| Has ≥5 matched non-cancer controls (Final Sample)                                                                  |           |           |
| <b>ET</b>                                                                                                          | <b>PV</b> | <b>MF</b> |
| 1,217                                                                                                              | 1,625     | 522       |

ET = essential thrombocythemia, PV = polycythemia vera,  
MF = myelofibrosis, HMO = health maintenance organization

\*MPN-NOS = 1,664 patients were identified in the study time period with a new diagnosis of MPN-NOS (myeloproliferative neoplasm-not otherwise specified) and excluded from this report
